# Supplementary material for: Fruit and Vegetable Consumption and Their Polyphenol Content Are Inversely Associated with Sleep Duration: Prospective Associations from the UK Women’s Cohort Study
Source: PubMed Central journal article supplement (PMC6266198; doi:10.3390/nu10111803), 2018-11-20
Supplement: nutrients-10-01803-s001.pdf [file nutrients-10-01803-s001.pdf]

**ACTIVITY**

37. On an average **weekday** how is your day spent?

|                                                                                  | Number of hours & / or minutes in a 24 hour day spent doing the following activities? |         |
|----------------------------------------------------------------------------------|---------------------------------------------------------------------------------------|---------|
|                                                                                  | Hours                                                                                 | Minutes |
| Sleeping                                                                         |                                                                                       |         |
| Sitting                                                                          |                                                                                       |         |
| Light activities (e.g. washing, dressing, eating)                                |                                                                                       |         |
| Standing                                                                         |                                                                                       |         |
| Household chores (e.g. vacuuming, ironing)                                       |                                                                                       |         |
| Lifting heavy objects                                                            |                                                                                       |         |
| Light exercise (e.g. walking, yoga, easy gardening)                              |                                                                                       |         |
| Moderate exercise (e.g. fast walking, easy swimming, hill walking, easy cycling) |                                                                                       |         |
| Strenuous exercise (e.g. running, vigorous swimming, high impact aerobics)       |                                                                                       |         |

38. On an average **weekend day** how is your day spent?

|                                                                                  | Number of hours & / or minutes in a 24 hour day spent doing the following activities? |         |
|----------------------------------------------------------------------------------|---------------------------------------------------------------------------------------|---------|
|                                                                                  | Hours                                                                                 | Minutes |
| Sleeping                                                                         |                                                                                       |         |
| Sitting                                                                          |                                                                                       |         |
| Light activities (e.g. washing, dressing, eating)                                |                                                                                       |         |
| Standing                                                                         |                                                                                       |         |
| Household chores (e.g. vacuuming, ironing)                                       |                                                                                       |         |
| Lifting heavy objects                                                            |                                                                                       |         |
| Light exercise (e.g. walking, yoga, easy gardening)                              |                                                                                       |         |
| Moderate exercise (e.g. fast walking, easy swimming, hill walking, easy cycling) |                                                                                       |         |
| Strenuous exercise (e.g. running, vigorous swimming, high impact aerobics)       |                                                                                       |         |

**Figure S1.** Sleep duration assessment method.

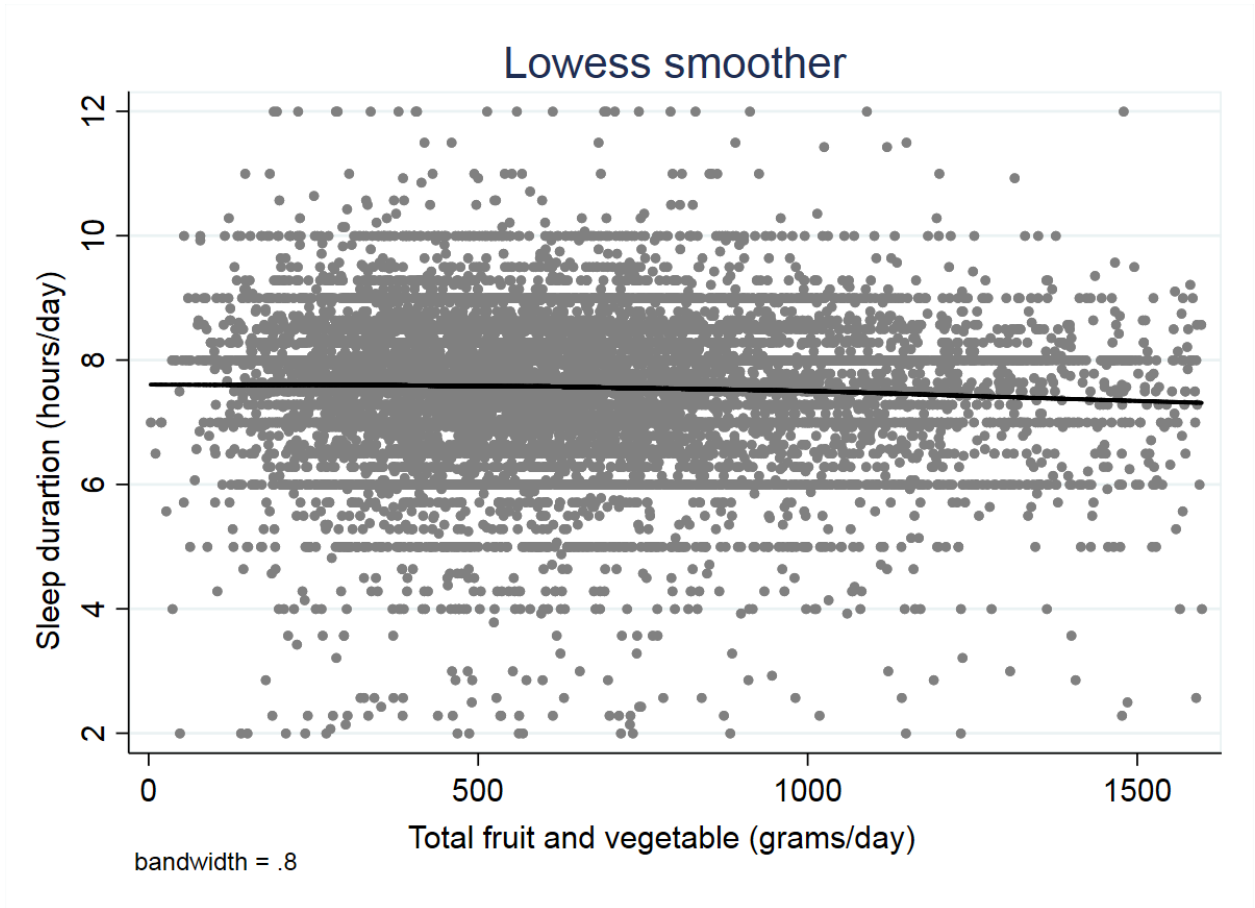

**Figure S2.** The relationship between fruit and vegetable intakes and sleep duration using locally weighted scatterplot smoothing (LOWESS).

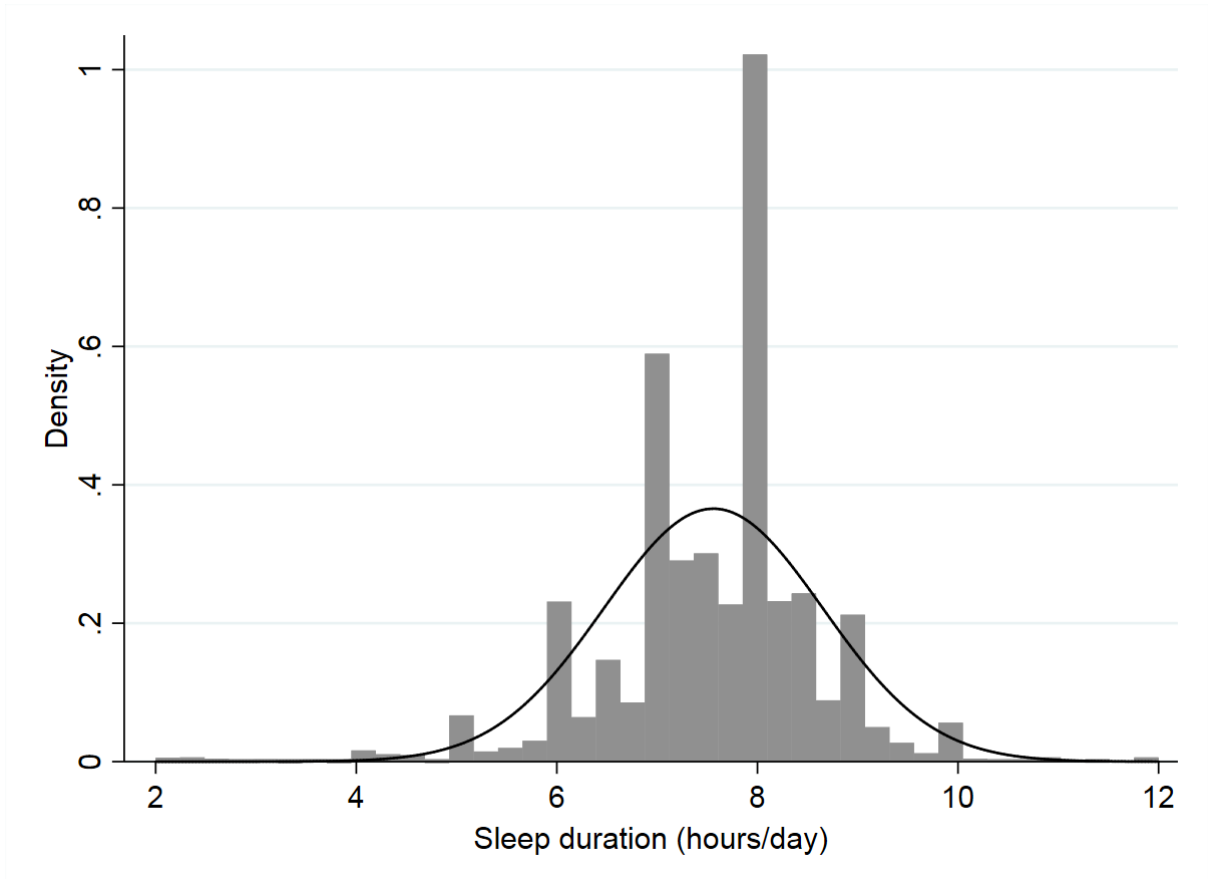

**Figure S3.** Normal distribution of sleep duration (outcome) using histogram plot.
